# Supplementary material
Source: PubMed Central journal article supplement (PMC5078561)

*TEF1* + *RPB2* + rDNA  
3690 bp  
103 PIC  
3 MPTs  
260 steps  
CI = 0.91  
RI = 0.88

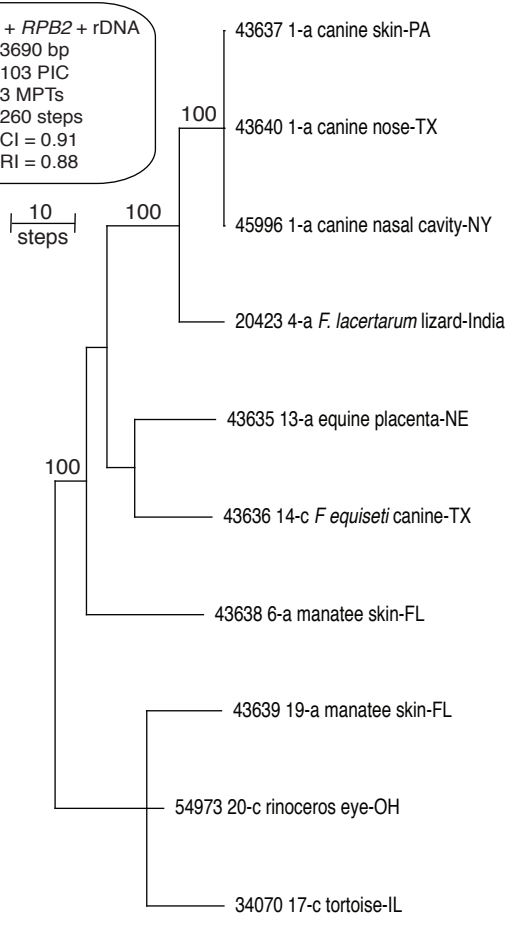

Supplement: JCM.01607-16_zjm999095212so2.pdf [file JCM.01607-16_zjm999095212so2.pdf]
